# Supplementary material
Source: PubMed Central journal article supplement (PMC5785414)
Supplement: NIHMS930749-supplement-1.pdf [file NIHMS930749-supplement-1.pdf]

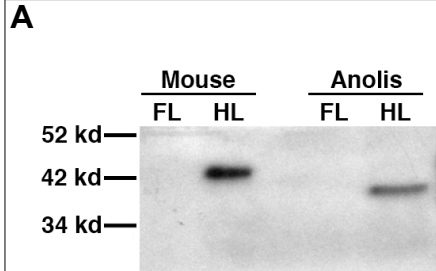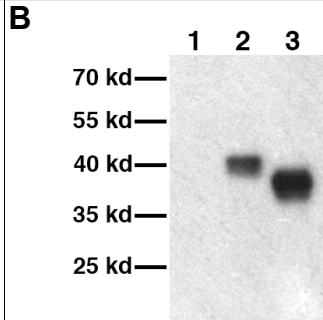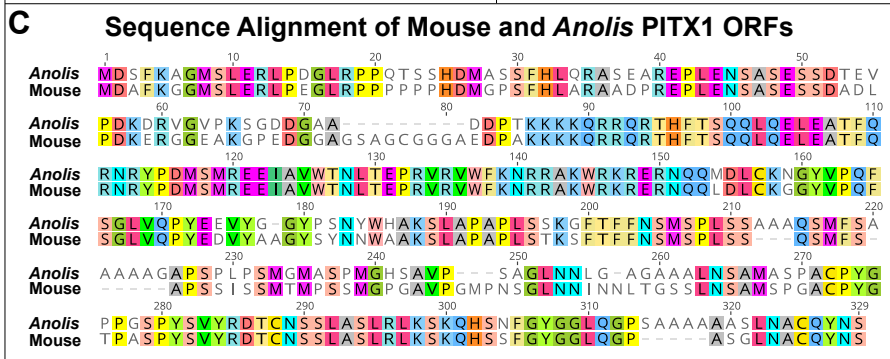

**Figure S1. PITX1 antibody specificity and sequence alignment of mouse and *Anolis* PITX1.** **A)** Western blot analysis of PITX1-specific antibody against protein extracts from mouse and *Anolis* hindlimbs. The antibody recognizes a hindlimb-specific protein in the embryonic hindlimbs of both species. 20 micrograms of protein were loaded onto each lane. **B)** Western blot using PITX1 antibody on HEK293T cells transformed with expression constructs containing GFP (lane 1) or the full ORF of Mouse PITX1 (lane 2) or *Anolis* PITX1 (lane 3). Mouse and *Anolis* PITX1 proteins exhibit different migration sizes despite having similar molecular weights. 10 micrograms of protein were loaded onto each lane. **C)** Sequence alignment of predicted mouse and *Anolis* PITX1 open reading frames (ORFs). The overall amino acid identity is 73%. Identical amino acids are highlighted in color.

### **A** *Anolis* MGI Expression: Detected

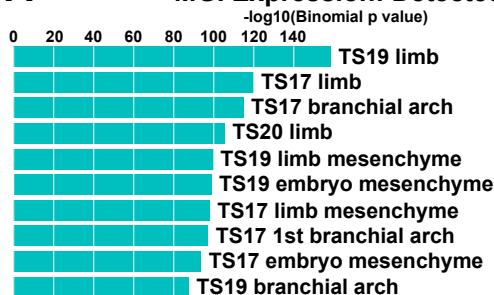

### **B** *Anolis* Human Phenotype

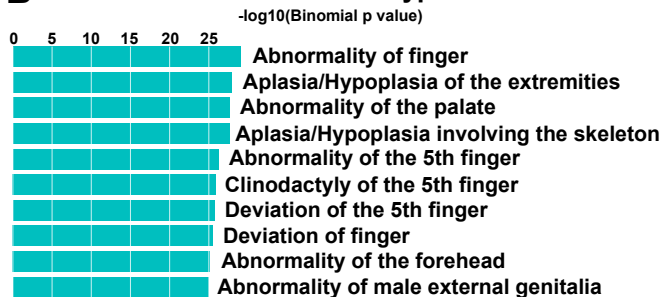

### **C** *Anolis* MSigDB Pathway

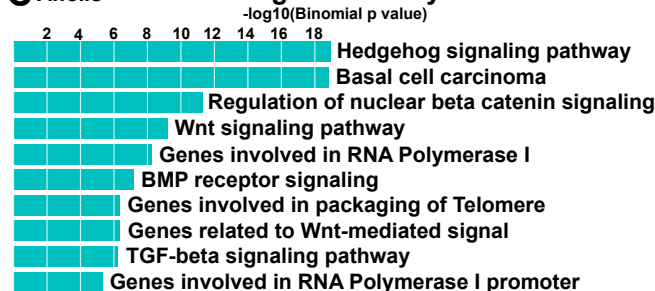

**Figure S2. Gene ontology associations of PITX1 binding sites in *Anolis* hindlimbs.** The top 10 GO terms associated with the subset of *Anolis* PITX1 peaks that have detectable sequence conservation in the mouse genome for the following gene ontology databases: **A)** Mouse Genome Informatics (MGI) Expression, **B)** Human Phenotype and **C)** MSigDB (Molecular Signature Database) Pathway. Analysis was performed using GREAT (McLean et al., 2010).

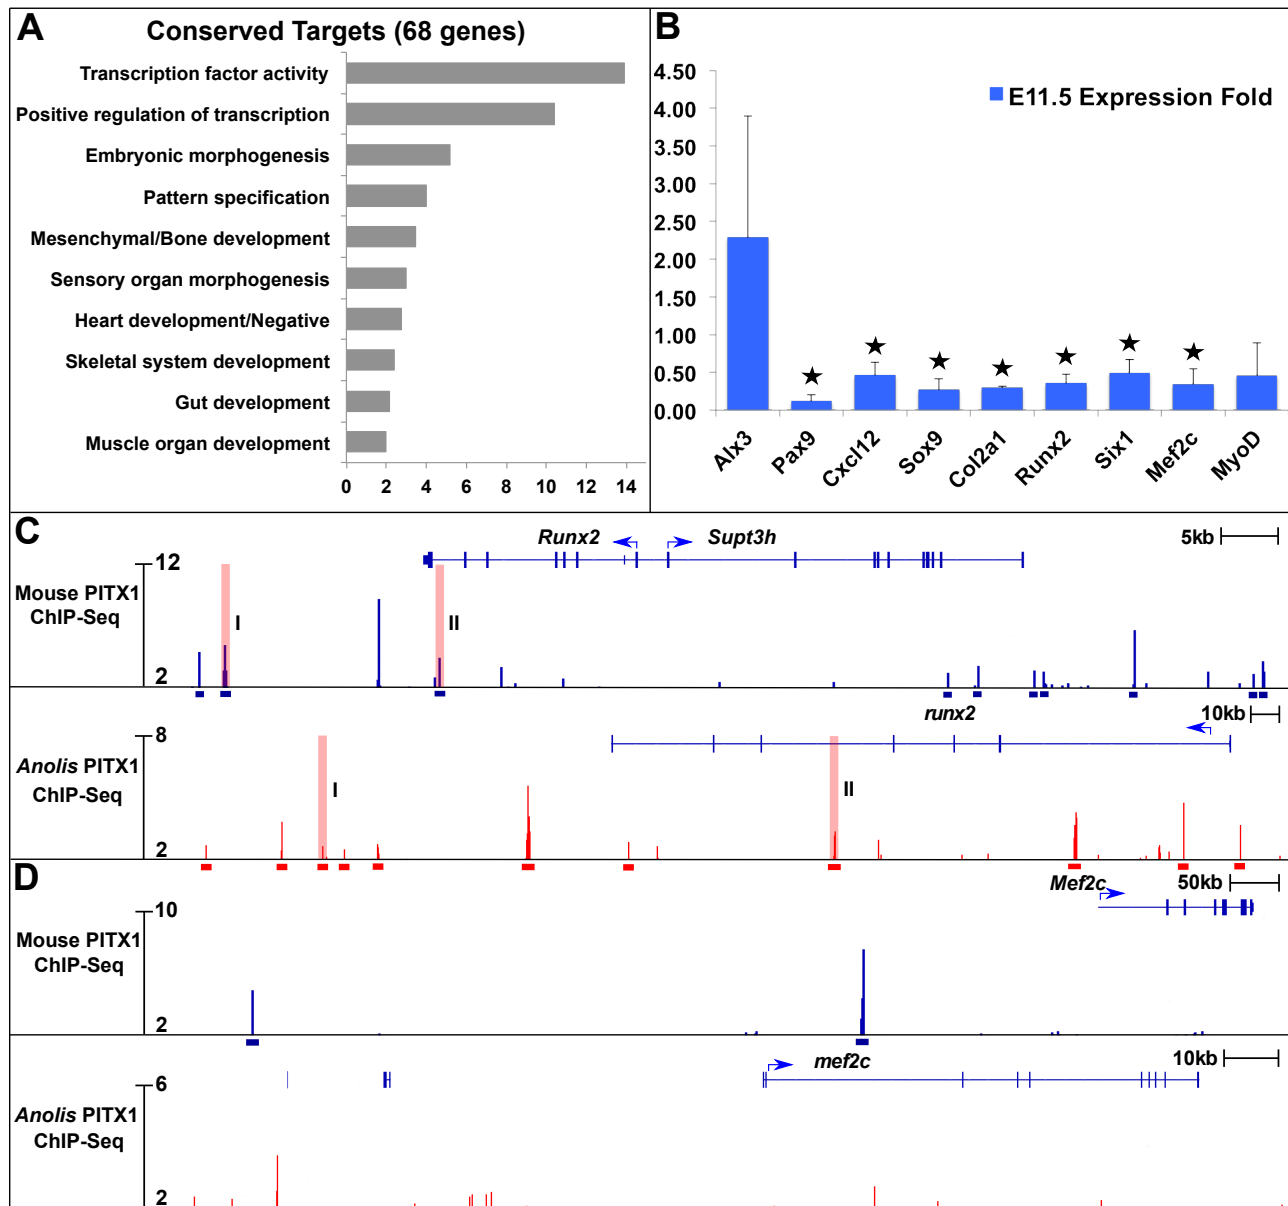

**Figure S3. The binding events and expression analyses of PITX1 putative direct targets.** **A)** The top 10 enriched clusters associated with conserved targets of PITX1 in developing mouse hindlimbs. **B)** qRT-PCR of limb patterning, chondrogenesis- and myogenesis-related genes in wide-type versus *Pitx1*<sup>-/-</sup> mouse hindlimbs at E11.5. Asterisks indicate  $p < 0.05$  (Two-tailed t-test). **C-D)** Comparison of PITX1 binding profiles in mouse and *Anolis* hindlimbs showing the positions of mouse, mouse/*Anolis* conserved and *Anolis* PITX1 peaks in the neighboring regions of putative direct targets **C)** *Runx2* and **D)** *Mef2c*. Blue bars underline identified mouse PITX1 peaks and red bars underline identified *Anolis* PITX1 peaks. Conserved peaks identified in both species are highlighted in pink. I and II are used to distinguish two different pairs of conserved peaks at the *Runx2* and *Mef2c* loci.
